## A unifying concept for the quantitative definition of functional mitral regurgitation

<sup>2</sup>Research Institute for Complex Systems - Complexity-Research, Vienna, Austria

**Objectives:** The current study aimed to define improved risk-thresholds specifically tailored to the complex nature of sMR that provide a unifying solution to the ongoing guideline-controversy.

**Results:** Measures of sMR severity were consistently associated with 5-year mortality with a HR for a 1-SD increase of 1.42 (95%CI 1.25-1.63,  $P < 0.001$ ) for EROA, 1.37 (95%CI 1.20-1.56,  $P < 0.001$ ) for RegVol and 1.50 (95%CI 1.30-1.73,  $P < 0.001$ ) for RegFrac. Results remained statistically significant after bootstrap- or clinical confounder-based adjustment. Spline-curve analyses (Figure 1A-C) showed a linearly increasing risk enabling to stratify in low-risk (EROA  $< 20\text{mm}^2$  and RegVol  $< 30\text{ml}$ ), intermediate-risk (EROA  $20\text{-}30\text{mm}^2$  and RegVol  $30\text{-}45\text{ml}$ ) and, high-risk (EROA  $\geq 30\text{mm}^2$  and RegVol  $\geq 45\text{ml}$ ). In the intermediate-risk group, a RegFrac  $\geq 50\%$  as indicator for hemodynamic severe sMR was associated with poor outcome ( $P = 0.017$ ). A unifying concept based on combined assessment of the EROA, the RegVol, and the RegFrac (Figure 1D) showed a significantly better discrimination compared to the currently established algorithms (Table 1).

Table 1

| Definition of severe SMR | Cox regression analysis |         | ROC analysis |                        | IDI analysis |         |
|--------------------------|-------------------------|---------|--------------|------------------------|--------------|---------|
|                          | HR (95%CI)              | P-Value | ROC          | P-Value-for-comparison | IDI          | P-Value |
| Unifying concept         | 3.76 (2.71-5.23)        | <0.001  | 0.63         | ---                    | ---          | ---     |
| ACC/AHA definition       | 3.20 (2.14-4.78)        | <0.001  | 0.57         | <0.001                 | 0.06         | <0.001  |
| ESC/EACTS definition     | 1.52 (1.10-2.09)        | 0.01    | 0.55         | <0.001                 | 0.13         | <0.001  |
| ACC/ASE expert consensus | 1.89 (1.40-2.56)        | <0.001  | 0.59         | 0.04                   | 0.08         | <0.001  |

Abstract P1764 Figure 1 A-D

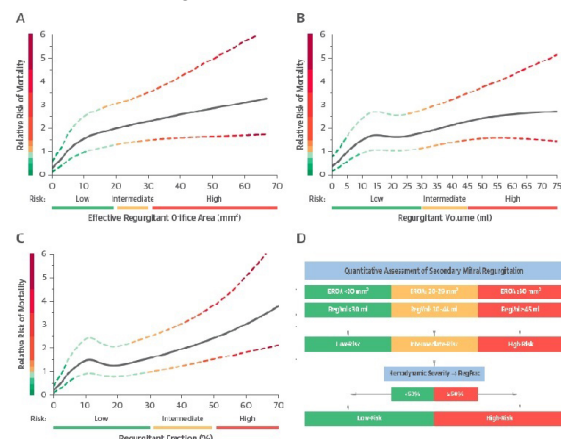

Source: http://academic.oup.com/ehjcimaging/article-pdf/21/Supplement_1/jez319.1122/31866609/jez319.1122.pdf
